# Supplementary figures and images for: PT-112 induces immunogenic cell death and synergizes with immune checkpoint blockers in mouse tumor models
Source: PubMed Central journal article supplement — Oncoimmunology. 2020 Feb 11;9(1):1721810. doi: 10.1080/2162402X.2020.1721810 (PMC7028345; doi:10.1080/2162402x.2020.1721810), 2020-02-11

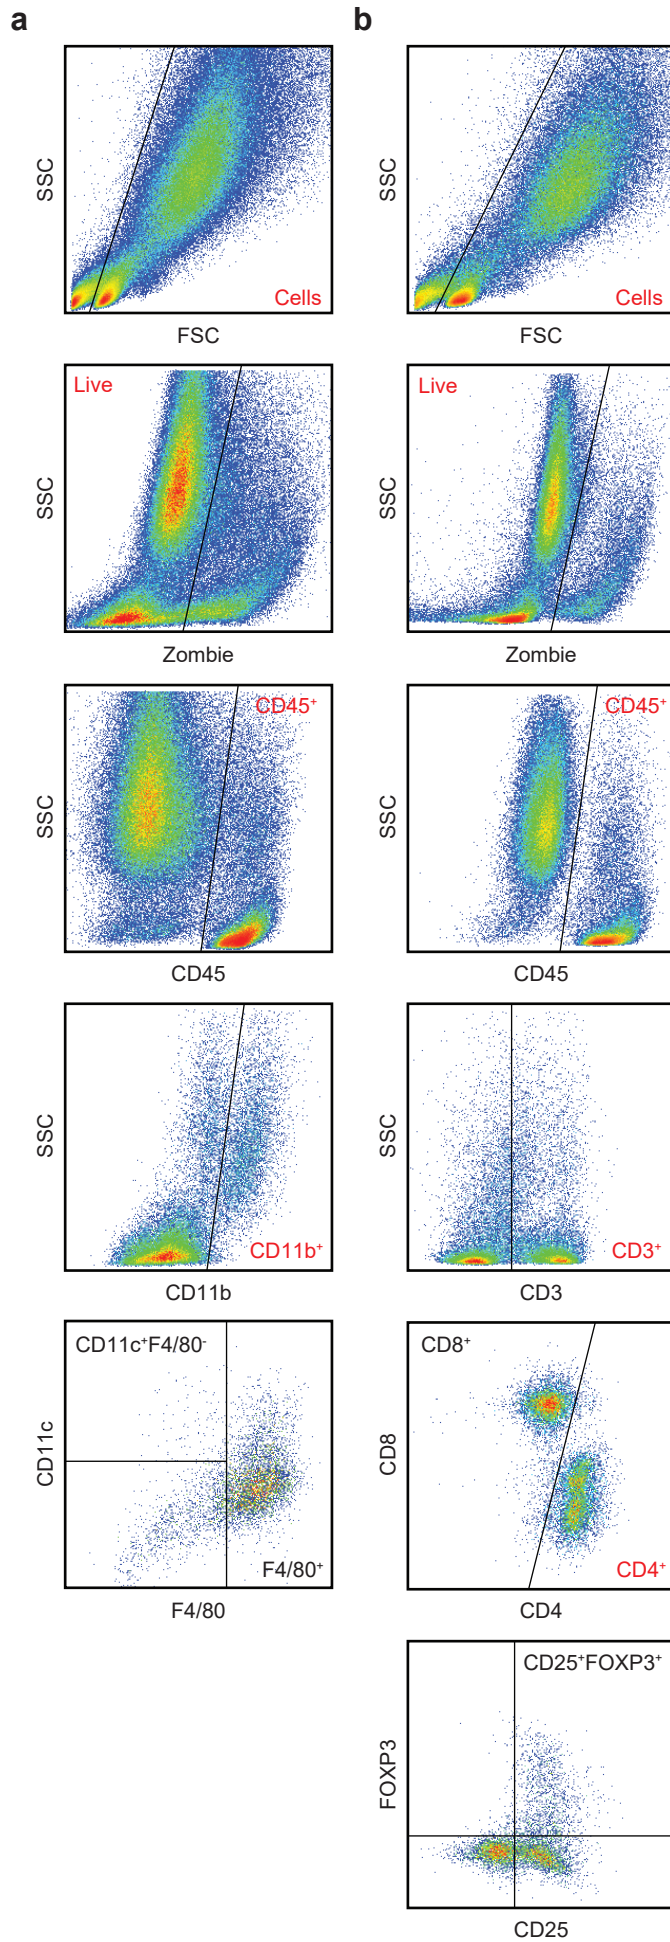

**Suppl. Fig. 2**

Supplement: koni-09-01-1721810-s002.pdf [file koni-09-01-1721810-s002.pdf]

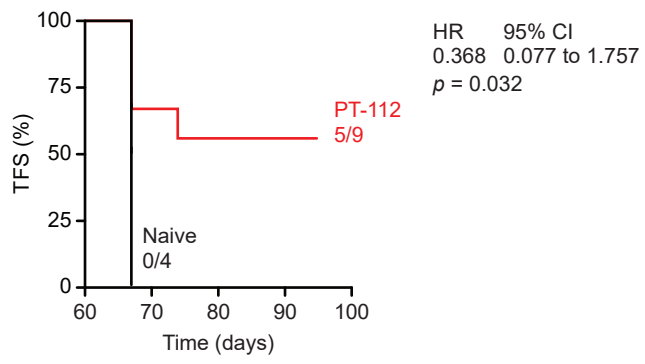

**Suppl. Fig. 1**

Supplement: koni-09-01-1721810-s003.pdf [file koni-09-01-1721810-s003.pdf]
